# Supplementary material for: What should we know to develop an information robot?
Source: PeerJ journal article supplement (doi:10.7717/peerj-cs.8), 2015-06-10
Supplement: Table1.xlsx [file Table1.xlsx]

## Sheet: information role
			Other
id	Direction giving	Recommendation (inqurity)	Lost child	Playing with children
140727_003	1	1
140727_004	1	1		1
140727_005	1	1
140727_006	1
140727_007	1
140727_008	1	1		1
140727_009	1	1
140727_010	1	1	1
140727_011	1	1
140727_012	1	1
140727_013	1	1
140727_014		1		1
140727_015	1	1
140727_016	1
140727_017	1	1		1
140727_018	1	1
140727_019	1	1
140727_020	1
1410727_021	1	1
14727_022	1	1		1
140727_23	1
21	20	16	1	5
	0.952381	0.761905	0.047619	0.238095

## Sheet: request
id		お店の名前	アイテム名	カテゴリ	特徴	行動	状態	other
140727_003	佐竹：まず、このロボットを使ってみて、また使ってみたいって思われましたか？ 客 ：うん、おもしろいかなと思った。 佐竹：おもしろいかなと思いました？じゃ、もし、このロボットが、ちょうど案内したいところにいた場合に、なんか、どんなこと聞けたらいいなって、どんなこと聞きたいなっていうのありましたら、ちょっと、ぜひ教えていただければなと思いまして。 客 ：どんなこと？ 佐竹：はい。先ほどはちょうどガスト、 客 ：場所ですね？ 佐竹：あ、場所。なんか行きたい場所。 客 ：行き方？ 佐竹：えーっと、あ、そこへ、 客 ：そう、行きたい場所への行き方？ 佐竹：行きたい場所への行き方、はい。あと、他にはどんなのが？あと思いつくことがあれば教えていただければ。 客 ：どんなお店とか。 佐竹：どんな、あ、お店の雰囲気とかみたいな感じですね。 客 ：何が置いてあるとか。 佐竹：あーはいはいはい…なるほど。あと…	1	1		1
140727_004	佐竹 ：はい、あのー、案内ロボットで作ってましたんですけど、また使ってみたいって思われました？ 客（親）：特に子供連れにはすごい良いと思います。 佐竹 ：あ、子供連れにはすごい、はい。あのー、 客（子）：むちゃくちゃかわいい！ 佐竹 ：あ、かわいかった、あははありがとう。もしロボットがまたいた時に、どんなことを質問できたらいいなと、質問、答えてくれたらいいなというのは、ありますか？ 客（親）：子供が楽しめる場所を教えてくれるとか。 佐竹 ：子供が楽しめる場所？ 客（親）：うん、やっぱ年齢性別言ったのはすごい良いと思った。 佐竹 ：あはは、年齢性別は良かった？ 客（親）：うん、びっくりしました。聞いてみたらってほんとに言ってくれて 客（子）：なんさーい？って言ったら、5歳、て言ったから。 佐竹 ：あ、びっくりした？あはは。 客（子）：あと、********女の子の**** 佐竹 ：あはは、…				1
140727_005	佐竹 ：あの案内ロボット、また会ったら使ってみたいと思われますか？ 客（男）：はい。 佐竹 ：じゃ、ちょうど案内を欲しい時にあのロボットがいたら、どんなことを聞きたいかっていうような、あの、ちょっとロボットに勉強させるためのものを知りたいなと思ってまして。今回の道案内は上手くできました？ 客（男）：うー…ん。 客（女）：道案内わかったようなわからんような、あんまわかってないかな。 客（男）：なんか、どういう、えーっと、どういう風に説明をすれば、説明を口頭で言えばいいのか、なんか、こう、物を見せればいいのか、 客（女）：目印になるものを見せるとか 客（男）：のか、だから、あれはどういう仕組みなんですか？モニタリングしてるんですか？ 佐竹 ：あ、あれはですね、言われた声のところに入るお店を探して、そこまでの指差しで道案内をしてるんですね。 客（男）：ふーん。 佐竹 ：で、他にも案内っていう形…	1		1	1	1
140727_006	佐竹 ：使ってみて、また使ってみたいと思われました？ 客（女）：ははは。 佐竹 ：それともまだ 客（女）：***（家族の名前？）どうやった？ 客（男）：よかったなあ 佐竹 ：楽しかった？おもしろかった？また使ってみたいと思った？ 客（女）：また使うなあ。 佐竹 ：じゃあ、ロボットが、案内して欲しい時、いたら、どんなこと聞いてみたいと思ったかな？…なかった？ 客（女）：あの、場所を教えてくれたからな。 佐竹 ：場所は聞けるとうれしかった？ 客（女）：うれしかったな。 佐竹 ：何聞いてくれたの？ 客（女）：今からな、ゴハン食べようかなと思ってたから、ゴハンどこで食べれる？って聞いてんな。あはは。 客（男）：お店教えてくれたな。 客（女）：お店教えてくれたな、ははは。 佐竹 ：はははは。お店教えてくれてよかった？もし他にも、こんなこと聞けたらいいなーっていうの、あったら…あるかな？あはは、**…	1				1
140727_007	佐竹 ：また使いたいって思われますか？ 客（１）：どうやろう。 佐竹 ：まだ、何か足りないところがありそう？ 客（２）：や、何に使うんですか？ 佐竹 ：一応、案内って形… 客（２）：あーだからそれはお店とか、の案内ですかねえ？ 客（１）：ふーーん。 佐竹 ：はい、はい。 客（２）：私だったら普通に使う。 客（１）：そう、使わなわかれへんやん。でも案内でちょっとこういうのがあると、 客（２）：あったら、今みたいに、子らは寄って行って楽しいとは思う。 客（１）：うん。 佐竹 ：はい。あまり使わないと？ 客（１）：いや、使わないというよりも、何ていうの、どっかこう、ショッピングモールみたいなところで、まあ、あったら便利かなーと思う。うん。 佐竹 ：どんな質問に答えられると便利かっていうの、ありますか？まだここらへん勉強中なんですよ。 客（１）：どんな質問て？ 佐竹 ：はい。さっきは、海はどこ、…	1
140727_008	佐竹 ：こちらの案内ロボットなんですけれども、また使ってみたいっていうふうに思われますか？ 客（男）：思いません。 佐竹 ：あはは、思わない。どこらへんがこう、だめなとこかなっていうのは？ 客（男）：見た目。 佐竹 ：見た目。もっと、えっと、かわいく？ 客（男）：そですね。 佐竹 ：とか、ちっちゃくとかって？ 客（男）：うん。かわいい。はははは。 佐竹 ：かわいい？ははは。もしそういうのが直っていった場合に、どんなこと、ロボットが答えられたらいいなっていうのは、ありますか？まだちょっとそこらへん勉強中で、まだまだ案内係として練習してるところなので。もし、何か、こんなこと聞いた時にロボットがスッって答えてくれたらいいな、っていうのがあれば。 客（女）：一人っ子が多いから、兄弟のようなロボットがいたらいいな、とすごく思うんですけど。 佐竹 ：あ、それは、ちょっと遊べるような形ですか？ 客（女…	1		1	1	1
140727_009	佐竹 ：あの、案内するロボットなんですけれども、また使ってみたいって思われました？ 客（母）：使ってみたい？ 客（子）：うん！ 佐竹 ：ほんと、よかった。 客（母）：うふふふ。 佐竹 ：もしロボットが案内できるところがあったら、どんな質問するかな？ロボットに対して。また、案内欲しいところに行ったら？ 客（母）：どんなこと聞きたい？ 客（子）：んー……おなかすいた。 佐竹 ：おなかすいた。うん。じゃ、さっき答えてくれたようなことができるといいかな？ 客（母）：それがいい？ 客（子）：うん。 佐竹 ：何か他にもあると、今勉強中だから、教えてもらえると… 客（母）：何か聞きたいことある？こんなん聞けたらいいなーとか。 客（子）：んー……わからない。 客（母）：わからない？ははは。 佐竹 ：わかんない？何か遊べる場所とか、そういうの聞けたらいいかな？ 客（母）：そやな？ 客（子）：うん。 客（母…	1				1	1
140727_010	佐竹 ：あの、今ちょうど使われてみて、どうでした？また使ってみたいって思われました？ 客（１）：また使ってみたいですねえ。 客（２）：このする場所があればねえ。 佐竹 ：あ、ほんとですか。今、実はまだ勉強中でして、こんなことを答えて…困った時、案内が欲しい時に、こんなロボットに質問して、答えてくれればいいっていうものがあれば、ぜひ教えていきたいなと思ってまして。 客（２）：こんな…ああ、このなかでっていうことですか？ 佐竹 ：この中でもいいですし、まあ、他の商業施設とかでも、こういう時使えたらいいなーとか。 客（１）：何か、コーヒー売ってるトコとか。そういうとことか、聞きたいですね。 佐竹 ：コーヒー売ってるトコとか、はい、はい。 客（２）：迷子になった子供を探すのに、直接、インフォメーションセンターとかへもできるように… 佐竹 ：あ、あの、インフォメーションセンターへ繋いで欲しい、 客…	1	1	1	1	1
140727_011	佐竹 ：ロボット使ってみてどうでした？また使ってみたいって思いました？どう？思ってくれた？ 客（子）：うん。 佐竹 ：やあ、よかった、ありがとう。じゃあ、今ですね、まだこのロボット勉強中でして、案内がほしいって思った時にどんなことができればいいのかって、まだ本当に勉強してるんですね。なんで、案内がほしい時に、ロボットにこんなことだったら聞くなあ、っていうようなことを教えていただけると、ロボットがどんどん賢くなるなあって思ってるんですけど。何かあれば教えていただきたいなあ、と。さきほどは…僕ちょうど目を話してたんですが。 客（母）：あー、さっきちょうど聞きたいことが聞けたんで、いや、すごいなーというのがねえ。 佐竹 ：何を聞いていただいたんですか？ 客（母）：下の子がちょっとお腹すいてて、食べるとこ探してて、お腹がすいた、だけを言ったら、ごはんですね？って言って、で、あのー 佐竹 ：ああ、…			1	1		1
140727_012	佐竹：…ってみたいと思われました、こちら？ 客 ：あ、あったら。 佐竹：あったら、 客 ：しゃべったけど… 佐竹：あ、大丈夫ですか？あの、案内まだ実は勉強中で、案内が、こんなのロボットに答えてもらいたい、答えられたらいいなっていうのがあったら、教えていただけるとロボットどんどん賢くできるなっていう状態でして。 客 ：はい。 佐竹：先ほど、海、って聞かれてました？ 客 ：ああ、海って、海どこですか？って。 佐竹：ああ、はい。あと、なんか、こんなことを聞くっていうのがあると、あのー 客 ：あ、トイレとか。 佐竹：トイレの場所、はい。あとは？ 客 ：トイレとか、あと、休憩できるとことか。 佐竹：休憩できる場所、はい、はい。何か、そういった感じのことを答えてくれるといいなと、はい。他にもロボットの欲しいサービスとかありますか？ 客 ：一緒に連れて行ってくれるとか、一緒に歩いてくれるとか。 佐竹：…	1				1
140727_013	佐竹：ロボット使ってみて、また使いたいと思われました？ 客 ：はい、子供はすごいおもしろい言うて。 佐竹：あはは、面白いって。 客 ：はい。 佐竹：もし案内が要る時にロボットがいたら、どんなこと聞けるといいかなっていうのを教えていただけるとと思いまして。まだ案内の勉強中なんですよ。 客 ：そうなんですか。何か、今、外のベンチで座れるとこないですか？って聞きたかったみたいやねんけど、うん。って聞いたら、水があるとこ教えてくれたから、まあまあ、いいかなと思って。*****を案内してくれた。 佐竹：なるほど。じゃあ、座れるところとか、ちょっと休憩できるところとか、っていうようなものを案内できれば。 客 ：そうですね。かなりアバウトでね。さっきローソン聞いたらちゃんと教えてくれた。 佐竹：あ、そうですか、じゃあローソンへの道とかだけじゃなくて、もう少しアバウトなものができればいいという形ですね。…	1				1
140727_014	佐竹：使ってみたいと思われました？ 客 ：あ、2回、2回目なんですよ。 佐竹：2回目なんですか？ 客 ：だから見つけてね、あのー、 佐竹：また使ってくださって、ありがとうございます！ 客 ：はい。前も来たときね、案内をしてもらって、なんか気に入ったみたいで。 佐竹：あ、そうですか。 客 ：はい。 佐竹：あのー、今まだ案内練習中で、 客 ：そうやんね。 佐竹：ロボットがこんな案内ができたらいいな、してもらえると嬉しい、というのを教えていただけると、どんどん増やしていけるなと思っていまして。 客 ：もしか良かったら、動いて、そのとこまで案内して連れて行ってくれるとか、それもひとつあるし。もっとこう、日常会話的な、案内だけじゃなくって会話的な。この子らとか知的障害を持ってる子で、そういうの好きやから、こう、相手してくれてね。 佐竹：あ、じゃあ、こんにちわーって、挨拶とか、そこらへん。 客 ：あ…			1	1	1
140727_015	佐竹：また使ってみたいと思われますか？ 客 ：まあ、注目はしますよね。その、また使うかどうかは別ですけど。物珍しさはあります。 佐竹：物珍しさはある、なるほど。あの、もし案内して欲しい時にあのロボットがいたら、どんなことを聞くかな？というのを教えていただければな、と思いまして。 客 ：場所によるかなと思うんですけど、こことかだったら目的がみんな明確じゃないですか。 佐竹：はいはい… 客 ：だから、あとは、どこなん？ていう感じになってくるかなと。 佐竹：ああ、何々のお店はどこなん？と。例えば他の、駅とかですと… 客 ：だったら、なんかこう、フラッと来てこう、例えば難波とか行くんだったら、けっこうみんな漠然とした目的なんで、そっちのほうが選択肢いっぱい挙げて出してもらえると。 佐竹：ああ、何か、遊ぶところとか、のんびりするところとか、といった、そんな形？ 客 ：そうそう。 佐竹：何か、案内係…	1			1	1
140727_016	佐竹 ：使ってみて、また使われたいって思われました？ 客（女）：うふふふ。 客（男）：まだ。 佐竹 ：まだ。どこらへんが足りないところと感じられましたか？ 客（女）：そうですね、あのー、スピードでしょうかね。 佐竹 ：それは、ははは、なるほど。じゃあ、そのスピードのところが直ったあとに、案内の仕事もまだこの子勉強してるところでして、案内だったら、ちょうどいい時にこんなことが聞きたいっていうのがあれば、そこらへんを教えていただければな、と思いまして。 客（女）：そうだな、本当に案内係と同じで、 佐竹 ：その時にこれがいたら、で、答えられたらこんなことを、と。はい。 客（女）：はい、あの、どこ、どうやって行き方とか、もう即座にね、インターネットみたいな感じで瞬時に答えがわかればいいなと思います。 佐竹 ：じゃあ、○○屋さんどこ？って言われたら、あっち、とかっていう形ですね。 客（女）：はい、…	1
140727_017	佐竹：ロボットと遊んでもらってありがとう！あの… 客（１）：面白いな～。 佐竹：面白い？…また使ってみたいと思うかな？ 客（2）：面白い！ 佐竹：面白い？ 客（3）：めっちゃ面白い。はい。 客（2）：ほんま面白いな～。 佐竹：あはは…案内、の仕事してる時にこんなこと訊けたらいいな、こんなこと訊きたいなってのがあれば是非教えてほしいなと思うんだけど。 客（2）：あっち、じゃなくて、あの…前に行ったり、左に行ったり 客（3）：あっちじゃなくて 佐竹：あ、前にとか左とか… 客（1）：ほんで、あの…自分が進んで道案内したり… 佐竹：あ、進んで連れて行ってくれる？うん、なるほど。他になんか訊きたいことある？ 客（3）：訊きたいことね～。うーん、そこの場所で一番売れてる箇所とかあるじゃないですか…うん 佐竹：あ～、売れてる場所とかおすすめの場所とかいったところ？ 客（1）：でも言っとったやん 客（3…				1	1
140727_018	佐竹：あ、どうも。簡単にです。このロボットを使ってみて、また使われてみたいって思われました？ 客（男）：そうですね。はい。 佐竹：あ、使われました？ありがとうございます！もし案内してほしいところにこのロボットが居た場合に、どんなことをロボットに訊きますか？あはは、ちょっと… 客（男）：行った先の混雑状況とか 佐竹：混雑状況 客（男）：そういうことですね。使用状況とか 佐竹：あー、今混んでるとか、 客（男）：はい、そうですね。 佐竹：あの、あそこ今混んでるから大変だよ、みたいな… 客（男）：はい、だから違うところに行った方が良いとか。 佐竹：あー、はいはいはい… 客（男）：そういうこと 佐竹：もう少しなんか詳しい情報と商業施設…なるほど。他には何か、あの…訊けると良いというような機能があると 客（男）：う～ん… 客（女）：でも、トイレも便利ちゃう？トイレって。 佐竹：トイレ 客（男）：ここ…	1			1
140727_019	佐竹：こちらのロボット…まぁ、見てのとおり案内するロボットなんですけど、また使ってみたいって思われますか？……また微妙な、ははは 客：使ってみたい 佐竹：はい 客：あ、え…どこに何があるとか？ 佐竹：あ、はい…実はまだ色々と勉強中でして 客：はい。 佐竹：案内してほしいときにこのロボットが居たら、どんなことを訊けるといいかな、訊きたいっていうのがあれば、是非教えて頂きたいなと思ってるんですよ。 客：あ、この中でですか？ 佐竹：あ、大体この商業施設の中ですけど…まぁ他の場所？駅とかにも置くことも考えてるので… 客：うん。 佐竹：あの…そういう時にはこういうことやっぱり訊きたいなぁっていう、はい。 客：駅だったら乗り換える場所…うん。 佐竹：乗り換える場所…はい。こういう所ですと… 客：こういう所だったら、例えば今日は、その…クワガタムシ？ 佐竹：あ、イベントがやってるよ！とかクワガタムシの…	1	1		1
140727_020	佐竹：ロボットを使ってみて…案内ロボットなんですけど、また使ってみたいと思われました？ 客（男）：ああ、いいと思います。すごくね。 佐竹：あ、思われました？ 客（男）：この、何事も喋れるみたいなやつやったらね。 佐竹：あはは、なるほど！ロボットもバイリンガルで。 客（男）：ね、もう。うん。 佐竹：またこの案内ロボットを置いていたら、まだちょっと案内の勉強してる最中なんですけども 客（男）：うん。 佐竹：どんなことを訊くかっていうのありますか？案内係でいて、案内してほしい所にいた場合に… 客（男）：せやな～、でもこのキャラだけでもね、けっこう 佐竹：あ、このキャラ。 客（男）：そうそうR2-D2みたいな形にしてね。 佐竹：あははは 客（男）：何人（なにじん）でもいいですよ、みたいな。 佐竹：あはは、なるほど。まぁ、先ほどはコンビニのファミリーマート… 客（男）：あれも中々ね！すごいなと…う…	1				1
1410727_021	客（子）：かしこい 客（女1）：めっちゃかしこいなと思いますね。 佐竹：あの、また使ってみたいと思われます？ 客（女1）：思います、思います！ 佐竹：実はまだ色々と勉強中でして…あの、案内したいっていった時にこんなことを答えてほしいって…あの、ものがあれば、ちょっとそれをどんどんロボットに加えていきたいと思うんですが。 客（女1）：今言った…あの例えば、こんなお店があるよとか言ってくれると 客（女2）：ショップ名を…ねぇ。 客（女1）：ああ、言ってほしい。 客（女2）：具体的なショップ名を…。 佐竹：ああ、あの、具体的なショップ名…はいはい。 客（女2）：言ってもらえたりとか。 客（女1）：あと、『ちょっと考え中です』とか言ってもらった方が…喋りかけそうになります。 客（女2）：そら、関西人だけちゃう。 佐竹：ああ、ちょっと…タイミングが悪く…あはは、間が分からず…って 客（女1）：そう…	1		1	1	1
14727_022	佐竹：あの、このロボット案内するロボットなんですけれども、また機会があったら使ってみたいと思われますか？ 客（男）：あ、はい。 佐竹：あ、そうですか！あの案内まだ実は勉強中でして… 客（男）：はい。 佐竹：あの、案内ロボット使いたいときにこんなこと案内してほしいっていう内容教えて頂けると、そういった内容ロボットに加えていくことが出来るんですね、で、そういうことを是非教えて頂ければなあと思いまして。 客（男）：ロボットに案内… 客（女1）：いきなりギュイっとかな 客（男）：ああ～せやな。 客（女1）：（ロボットが）『あっち』、あっち？って。 客（男）：ああ、そうかそうか…具体的なあれがないけど 客（女1）：でもそれは…手であっちってやってるのはほんまにその方向を指してるから 佐竹：指してるうえですね。 客（女1）：それはすごいな…うんうん。 客（男）：うん、そうやな。 佐竹：あ、あの別に具…	1	1		1	1
140727_23	佐竹：またあの案内ロボット使ってみたいと思われますか？ 客（子）：はい。 佐竹：はい…あはは、あのまだ案内のところ練習中なんですけれども、もし案内してほしいときにあのロボットが居たら、こんな案内訊くなっていうものがあったら教えて頂ければな、と思うんですけれども。 客（母）：どんな案内があったら良いの？ 客（子）：う～ん… 佐竹：道…道案内？ですか。 客（子）：ああ、道案内。 佐竹：道案内…あとシルバニアファミリーとかいろいろと訊いて頂いてたんで… 客（母）：ああ…あはは。 佐竹：何かそこら辺で…あ、こんなのはこの施設で訊きたいなっていうのがあったら是非教えて頂ければなと思いまして。ま、もしくは他にこんなこと出来たら、もっと嬉しいなってことでも。 客（母）：なんやろ、分からん。 佐竹：あははは…大体じゃあ道案内、今くらいのでいったら大丈夫かなって形ですか。はい、分かりました。ありがとうござ…		1
